# Supplementary material for: Integrated Analysis of the Roles of Long Noncoding RNA and Coding RNA Expression in Sheep (Ovis aries) Skin during Initiation of Secondary Hair Follicle
Source: PubMed Central journal article supplement (PMC4898689; doi:10.1371/journal.pone.0156890), 2016-06-08

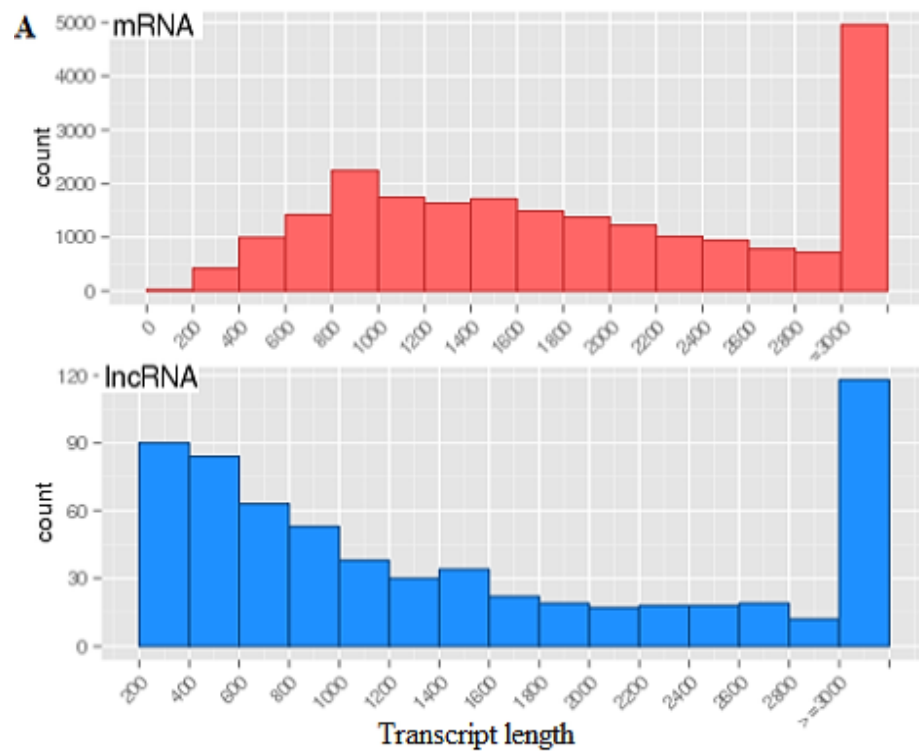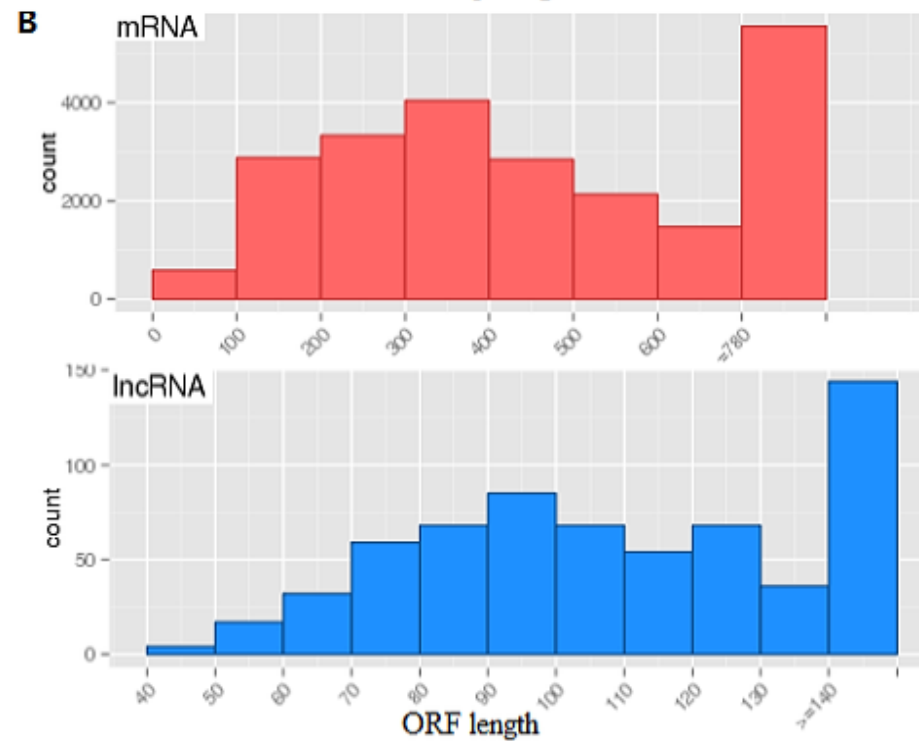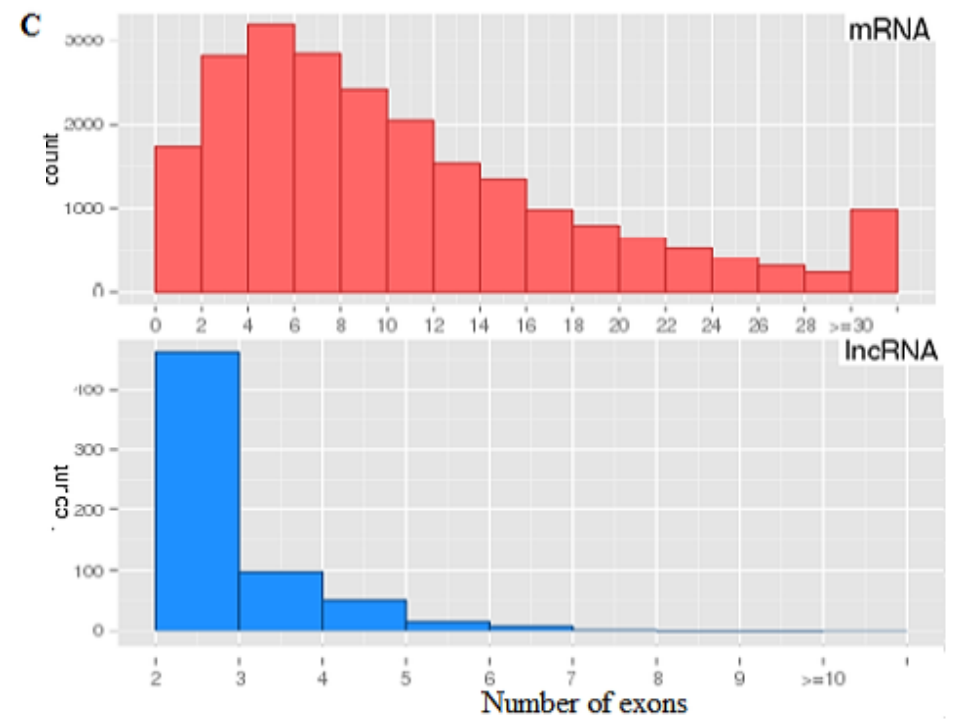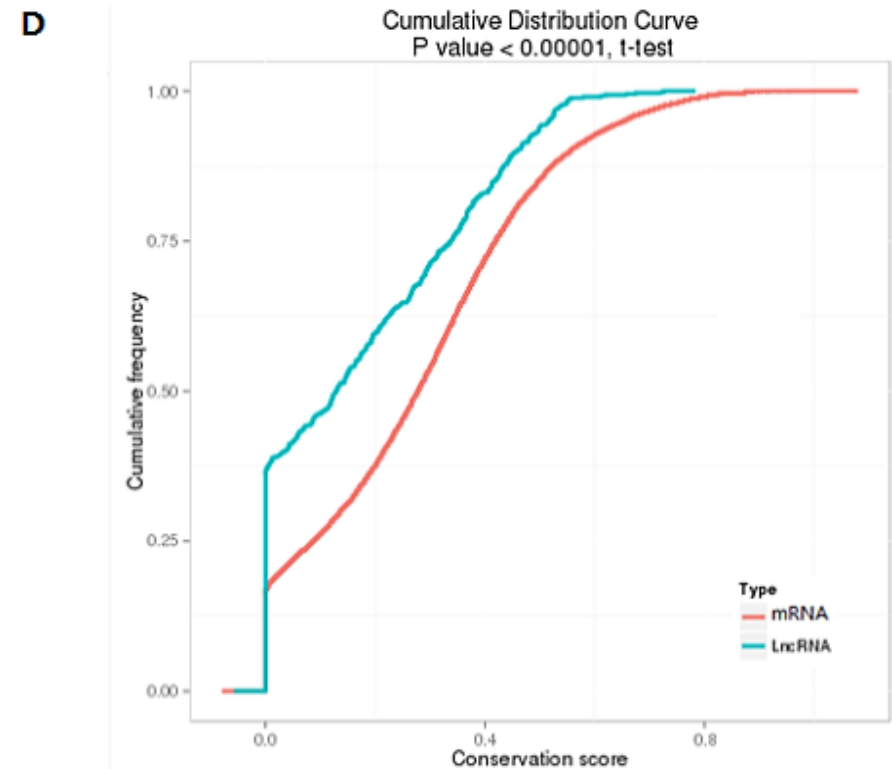

Supplement: pone.0156890.s001.pdf [file pone.0156890.s001.pdf]
